# Supplementary material for: Preventing unintentional injuries to children under 15 years in the outdoors: a systematic review of the effectiveness of educational programs
Source: PubMed Central journal article supplement — Inj Prev. 2011 Sep 2;18(2):113–23. doi: 10.1136/injuryprev-2011-040043 (PMC3311869; doi:10.1136/injuryprev-2011-040043), 2011-09-02
Supplement: injuryprev-2011-040043-s3.pdf [file injuryprev-2011-040043-s3.pdf]

### Supplementary file 3 – Quality appraisal

#### Interventions to prevent unintentional injury to children during outdoor play and leisure: Quality appraisal

|                                                                   | Asher et al. (1995) | Azaredo et al. (2003) | Bennett et al. (1999) | D'Argenio et al. (1996) | Frederick & Barlow (2006) | Frederick et al. (2000) | Forjuoh et al. (2004) | Gielen et al. (1996) | Greene et al. (2002) | Heck et al. (2001) | Kendrick et al. (1999) | Mayer et al. (1998) | McCallum et al. (2005) | Moran & Stanley (2006) | Morrongello & Mark (2008) | Morrongello & Matheis (2007) | Richards et al. (1991) | Solis (1991) | Tenn & Dewis (1993) | Terzidis et al. (2007) | Treser et al. (1997) | Wehner & Sutton (2005) | Wesner (2003) |
|-------------------------------------------------------------------|---------------------|-----------------------|-----------------------|-------------------------|---------------------------|-------------------------|-----------------------|----------------------|----------------------|--------------------|------------------------|---------------------|------------------------|------------------------|---------------------------|------------------------------|------------------------|--------------|---------------------|------------------------|----------------------|------------------------|---------------|
| Source population well described?                                 | ++                  | +                     | +                     | ++                      | NR                        | -                       | -                     | +                    | NR                   | -                  | +                      | +                   | +                      | -                      | +                         | +                            | +                      | NR           | +                   | ++                     | -                    | -                      | -             |
| Eligible population representative of the population of interest? | +                   | +                     | ++                    | NA                      | NR                        | -                       | NR                    | +                    | NR                   | NR                 | +                      | NR                  | NR                     | -                      | +                         | +                            | +                      | NR           | NR                  | -                      | NR                   | +                      | NR            |
| Selected area represents eligible population?                     | +                   | +                     | -                     | NA                      | -                         | -                       | NR                    | ++                   | NR                   | NR                 | ++                     | +                   | -                      | -                      | +                         | ++                           | +                      | NR           | NR                  | -                      | -                    | +                      | +             |
| Allocation to I/C arms                                            | +                   | NR                    | NA                    | NA                      | NA                        | -                       | NA                    | NA                   | NR                   | NA                 | +                      | ++                  | -                      | NA                     | -                         | -                            | -                      | NA           | NR                  | -                      | NA                   | NA                     | +             |
| I/C well described and appropriate?                               | ++                  | +                     | ++                    | +                       | ++                        | ++                      | +                     | ++                   | +                    | +                  | ++                     | ++                  | +                      | +                      | +                         | ++                           | +                      | +            | ++                  | ++                     | +                    | +                      | ++            |
| Allocation concealed?                                             | NR                  | NA                    | NA                    | NA                      | NA                        | -                       | NA                    | NA                   | NR                   | NA                 | ++                     | NR                  | NA                     | NA                     | +                         | NR                           | NA                     | NA           | NR                  | -                      | NA                   | NA                     | NR            |
| Participants/ investigators blind to exposure and comparison?     | +                   | NA                    | NA                    | NA                      | NA                        | NR                      | NA                    | NA                   | NR                   | NA                 | +                      | +                   | NA                     | NA                     | +                         | NR                           | NA                     | NA           | NR                  | -                      | NA                   | NA                     | NR            |
| Exposure to I/C adequate?                                         | ++                  | +                     | -                     | NR                      | NR                        | -                       | NR                    | NR                   | NR                   | NA                 | +                      | ++                  | NR                     | NR                     | NA                        | ++                           | +                      | +            | NR                  | NR                     | NA                   | +                      | NR            |
| Contamination acceptably low?                                     | ++                  | NR                    | NA                    | NA                      | +                         | +                       | NA                    | NA                   | NR                   | NA                 | ++                     | ++                  | NA                     | NA                     | +                         | +                            | -                      | NA           | NR                  | NR                     | NA                   | NA                     | ++            |
| Other interventions similar in both groups?                       | ++                  | NR                    | NA                    | NA                      | NA                        | -                       | NA                    | NA                   | NR                   | NA                 | NR                     | +                   | NA                     | NA                     | ++                        | ++                           | NA                     | NA           | +                   | NR                     | NA                   | NA                     | ++            |
| All participants accounted for at study conclusion?               | +                   | NR                    | -                     | NA                      | NR                        | ++                      | NA                    | -                    | NR                   | NR                 | ++                     | +                   | NR                     | ++                     | NR                        | ++                           | NA                     | NR           | +                   | +                      | NA                   | NR                     | NR            |
| Did the setting reflect usual UK practice?                        | NR                  | +                     | +                     | +                       | ++                        | ++                      | +                     | +                    | +                    | +                  | ++                     | +                   | -                      | -                      | +                         | +                            | NA                     | NA           | +                   | +                      | +                    | NA                     | +             |
| Did I/C comparison reflect usual practice?                        | NR                  | +                     | +                     | +                       | +                         | ++                      | NR                    | -                    | +                    | +                  | ++                     | +                   | -                      | -                      | +                         | +                            | NA                     | NA           | +                   | +                      | +                    | NA                     | +             |
| Outcome measures reliable?                                        | +                   | +                     | +                     | +                       | -                         | -                       | -                     | +                    | -                    | -                  | +                      | +                   | -                      | -                      | +                         | -                            | -                      | NR           | +                   | +                      | -                    | -                      | +             |
| Outcome measurement complete?                                     | +                   | +                     | ++                    | +                       | NR                        | +                       | NR                    | +                    | NR                   | NR                 | ++                     | +                   | NR                     | +                      | NR                        | NR                           | +                      | +            | +                   | NR                     | +                    | +                      | +             |

### Supplementary file 3 – Quality appraisal

|                                                                                          | Asher et al. (1995) | Azaredo et al. (2003) | Bennett et al. (1999) | D'Argenio et al. (1996) | Frederick & Barlow (2006) | Frederick et al. (2000) | Forjuoh et al. (2004) | Gielen et al. (1996) | Greene et al. (2002) | Heck et al. (2001) | Kendrick et al. (1999) | Mayer et al. (1998) | McCallum et al. (2005) | Moran & Stanley (2006) | Morrongiello & Mark (2008) | Morrongiello & Matheis (2007) | Richards et al. (1991) | Solis (1991) | Tenn & Dewis (1993) | Terzidis et al. (2007) | Treser et al. (1997) | Wehner & Sutton (2005) | Wesner (2003) |
|------------------------------------------------------------------------------------------|---------------------|-----------------------|-----------------------|-------------------------|---------------------------|-------------------------|-----------------------|----------------------|----------------------|--------------------|------------------------|---------------------|------------------------|------------------------|----------------------------|-------------------------------|------------------------|--------------|---------------------|------------------------|----------------------|------------------------|---------------|
| Outcomes relevant?                                                                       | +                   | +                     | +                     | ++                      | +                         | +                       | +                     | ++                   | +                    | +                  | +                      | +                   | +                      | +                      | ++                         | +                             | +                      | -            | ++                  | +                      | ++                   | +                      | +             |
| Similar timing of outcome measurements in I/C groups?                                    | ++                  | -                     | +                     | NA                      | NA                        | ++                      | NA                    | NA                   | ++                   | -                  | +                      | ++                  | NA                     | NA                     | ++                         | ++                            | -                      | -            | ++                  | +                      | NA                   | NA                     | ++            |
| Follow-up time meaningful?                                                               | ++                  | -                     | +                     | ++                      | +                         | ++                      | +                     | -                    | -                    | -                  | +                      | +                   | +                      | -                      | +                          | +                             | -                      | -            | +                   | +                      | +                    | +                      | -             |
| I/C groups similar at baseline? If not, were these adjusted?                             | ++                  | NR                    | NA                    | NA                      | NA                        | NR                      | NA                    | NA                   | +                    | NA                 | +                      | ++                  | NA                     | NA                     | -                          | +                             | NA                     | NA           | NR                  | +                      | NA                   | NA                     | +             |
| Intention to treat analysis?                                                             | -                   | NR                    | NA                    | NA                      | NA                        | NR                      | NA                    | NA                   | NR                   | NA                 | ++                     | NR                  | NA                     | NA                     | NR                         | NR                            | NA                     | NA           | NR                  | NR                     | NR                   | NA                     | NR            |
| Study sufficiently powered?                                                              | -                   | NR                    | +                     | NR                      | NR                        | +                       | NR                    | +                    | NR                   | NR                 | +                      | NR                  | NR                     | NR                     | NR                         | NR                            | NR                     | NR           | -                   | +                      | NR                   | +                      | NR            |
| Estimates of effect size given or calculable?                                            | ++                  | -                     | ++                    | -                       | +                         | +                       | -                     | +                    | +                    | -                  | ++                     | +                   | -                      | +                      | -                          | -                             | -                      | -            | +                   | ++                     | +                    | -                      | +             |
| Analytical methods appropriate?                                                          | ++                  | -                     | +                     | -                       | -                         | -                       | ++                    | +                    | -                    | +                  | ++                     | +                   | ++                     | +                      | +                          | ++                            | +                      | +            | -                   | +                      | +                    | -                      | +             |
| Precision/uncertainty of intervention effects given or calculable? Were they meaningful? | ++                  | +                     | +                     | NR                      | NR                        | NR                      | NR                    | +                    |                      | -                  | ++                     | -                   | +                      | +                      | NR                         | NR                            | NR                     | -            | -                   | +                      | +                    | NR                     | +             |
| Study results internally valid (i.e. unbiased)?                                          | +                   | -                     | +                     | -                       | -                         | +                       | -                     | +                    | -                    | -                  | ++                     | ++                  | -                      | -                      | +                          | +                             | -                      | -            | -                   | +                      | -                    | -                      | +             |
| Results generalisable to the source population (i.e. externally valid)?                  | +                   | -                     | +                     | -                       | -                         | +                       | -                     | +                    | -                    | -                  | ++                     | +                   | -                      | -                      | +                          | +                             | -                      | -            | -                   | +                      | -                    | -                      | +             |

**Notes:**

++ Indicates that for that particular aspect of study design, the study has been designed/conducted in such a way as to minimise the risk of bias

+ Indicates that either the answer to the checklist question is not clear from the way that the study is reported, or that the study may not have addressed all potential sources of bias for that particular aspect of study design

- Indicates aspects of study design in which significant sources of bias may persist

NR Not reported

NA Not applicable
